# Supplementary material
Source: publisher site journal article supplement (https://www.dovepress.com/get_supplementary_file.php?f=434030.docx)
Supplement: Supplementary file 1 [file get_supplementary_file.php]

**Survey on self-medication with antibiotics**

| **1.**Code **_____** | **2.** Sex: Female ☐ Male ☐ |
| --- | --- |
| **3.** What neighborhood do you live in? **_______________** | **3.** Age group  ☐ Young 18-26 years old ☐ Adult 27-59 years old  ☐ Elderly > 59 years old |
| **4.**What is the economic level?  ☐ Low (stratum 1-2) ☐ Middle (stratum 3-4)  ☐ High (stratum 5-6) | **5.**What is your highest school level reached?  None ☐ Basic ☐ Intermediate ☐ Technical education  ☐ Higher education |
| **6.** Did you study any career related to healthcare? (Medicine, nursing, bacteriology, dentistry, etc.)  No ☐ Yes ☐ | **7.** Have you heard about bacterial resistance?  No ☐ Yes ☐ |
| **8.** Have you received information about bacterial resistance?  No ☐ Yes ☐ | **9.** Have you received information about the use of antibiotics?  No ☐ Yes ☐ |
| **10.** Have you taken antibiotics without a medical prescription during the past year?  No ☐ Yes ☐  **11.** Which antibiotic did you take? ____________________ | **12.** What was the illness for which you took antibiotics?  Cough/cold/flu/Covid ☐ Urinary infection ☐  Tonsillitis ☐ Wound infection ☐  Headache ☐ Fever ☐  Sore Throat ☐ Diarrhea ☐  Ear/eye infection ☐ Toothache ☐  Other ☐ Wich other? _____________ |
